# Supplementary material
Source: Springer Nature journal article supplement (https://www.springerprofessional.de/resource/supplementary/13638_2012_578_MOESM4_ESM.pdf/11897972)

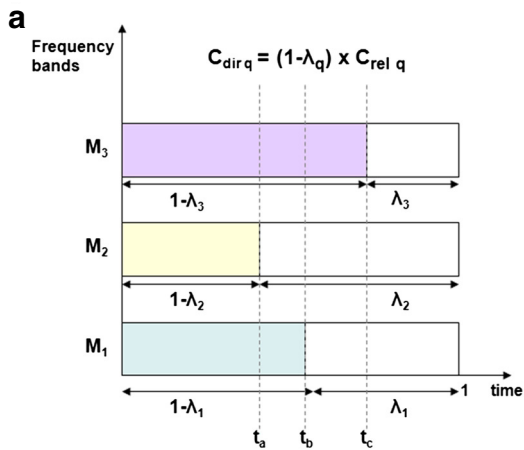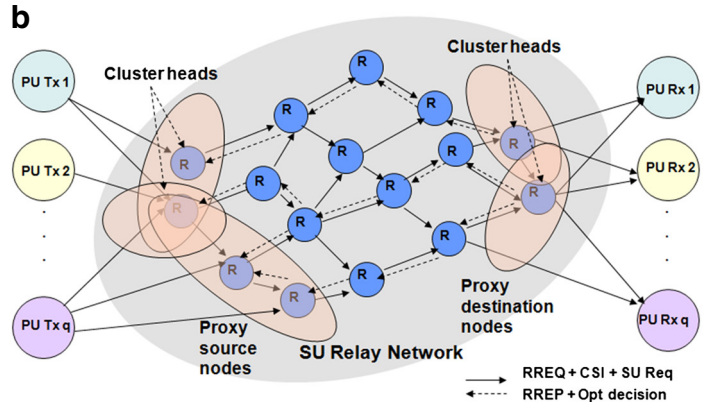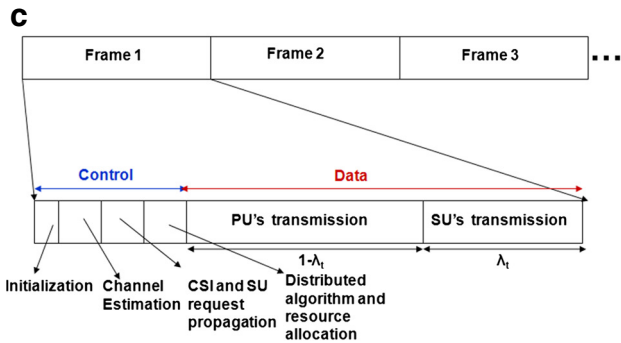

Supplement: MOESM4 [file 11897972]
